# Supplementary material for: Hybrid plasmonic gap modes in metal film-coupled dimers and their physical origins revealed by polarization resolved dark field spectroscopy
Source: Royal Society of Chemistry journal article supplement (doi:10.1039/c5nr09260d), 2016-01-01
Supplement: c5nr09260d1.pdf [file c5nr09260d1.pdf]

## Electronic Supporting Information

### Hybrid plasmonic gap modes in metal film-coupled dimers and their physical origins revealed by polarization resolved dark field spectroscopy

Guang-Can Li,<sup>a</sup> Yong-Liang Zhang<sup>a</sup> and Dang Yuan Lei<sup>a\*</sup>

<sup>a</sup> Department of Applied Physics, The Hong Kong Polytechnic University, Hong Kong, China

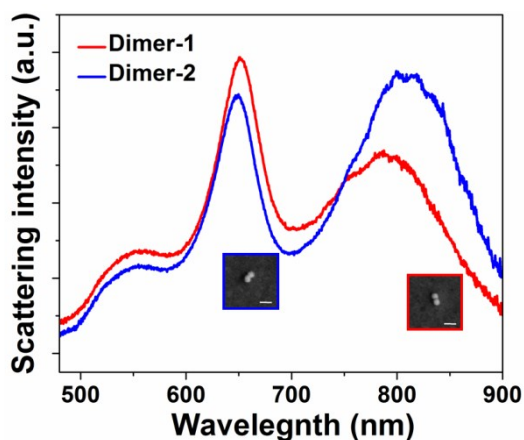

Figure S1. Scattering spectra of two nanosphere dimers measured under un-polarized light excitation. The scalar bars in the insets are 200 nm. As can be seen, the size difference between the two constitute nanospheres of each dimer is negligible.

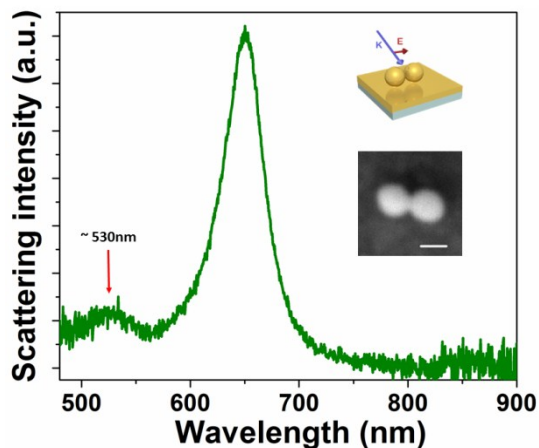

Figure S2. Scattering spectrum of a nanosphere dimer measured under s-polarized light excitation. The scalar bar in the inset is 100 nm. The plasmon resonance at around 530 nm is clearly identified.
